# Supplementary material
Source: PubMed Central journal article supplement (PMC2732295)
Supplement: btn605_1.pdf [file btn605_1.pdf]

# 1 Supplementary Methods

## 1.1 Derivation test of the BBLS calculation

In the Methods, we proposed an extension of the standard branch length score (BLS) by incorporating the uncertainty associated with determining motif instances at the leaf nodes,

$$BBLS(p_V) = \sum_{\sigma_V} P(\sigma_V) BLS(\sigma_V) \quad (1)$$

where  $V = \{1, 2, \dots, n\}$  is the set of leaf nodes in the tree.  $p_V = (p_1, p_2, \dots, p_n)$  with  $p_i \equiv P(\sigma_i = 1)$ , denoting the probability of the sequence in node  $i$  containing a motif site.  $P(\sigma_V) \equiv \prod_{i=1}^n [\sigma_i p_i + (1 - \sigma_i)(1 - p_i)]$ , and  $BLS(\sigma_V)$  is the branch length score of the set of leaf nodes with  $\sigma_i = 1$  for all  $i \in V$ . Note that  $BLS(\sigma_V)$  is zero if  $\sum_{i \in V} \sigma_i \leq 1$ .

Let  $MRC A(\sigma_V)$  denote the most recent common ancestor (MRCA) of the leaf nodes in  $V$  with  $\sigma_i = 1$ .  $BLS(\sigma_V)$  is then the total branch length of the subtree that connects  $MRC A(\sigma_V)$  and all leaf nodes with  $\sigma_i = 1$  for all  $i \in V$ .

Eq. (1) involves the summation of  $2^n$  terms, corresponding to all possible 0-1 configurations of the leaf nodes. In general, it can not be directly applied for computing  $BBLS(p_V)$  when  $n$  is large. However, we note that there are at most  $n - 1$  MRCA's involved in the summation, and we can regroup terms in Eq. (1) according to which MRCA is used, which leads to

$$BBLS(p_V) = \sum_{i=n+1}^N P(MRC A = i) L(T_i | MRC A = i). \quad (2)$$

where  $N = 2n - 1$  is the total number of nodes in the tree,  $P(MRC A = i)$  is the probability of the MRCA being node  $i$ , and  $L(T_i | MRC A = i)$  is the BBLS of the subtree  $T_i$  conditioned on  $MRC A = i$ .

$P(MRC A = i)$  can be calculated according to

$$P(MRC A = i) = P(\sigma_{c^1(i)} = 1) P(\sigma_{c^2(i)} = 1) P(\sigma_{T_i^c} = 0) \quad (3)$$

that is, the product of the probabilities that both of its two child nodes are in state 1 and all leaf nodes that are not descendent of  $i$  are in state 0. Both  $P(\sigma_i = 1)$  and  $P(\sigma_{T_i^c} = 0)$  can be

calculated efficiently using the following recursion:

$$P(\sigma_i = 1) = 1 - [1 - P(\sigma_{c^1(i)} = 1)][1 - P(\sigma_{c^2(i)} = 1)] \quad (4)$$

$$P(\sigma_{T_i^c} = 0) = P(\sigma_{T_{\pi(i)}^c} = 0)[1 - P(\sigma_{s(i)} = 1)] \quad (5)$$

where  $s(i)$  denotes the sister node of node  $i$ . For a given binary assignment  $\sigma_V$  of the leaf nodes, Eq. (4) propagates  $\sigma$  toward the root using the OR operator.

$L(T_i|MRCRA = i)$  is the BBLS of the subtree  $T_i$  conditioned on  $MRCRA = i$ . Since node  $i$  is a MRCA, both of its two child nodes are included in the subtree  $T_i$ , that is,  $L(T_i|MRCRA = i)$  includes the summation of  $l_{c^1(i)}$  and  $l_{c^2(i)}$  ( $l_i$  is the length of the edge leading to node  $i$ ). In addition, the edges contained in the two subtrees of  $c^1(i)$  and  $c^2(i)$  have also to be included:

$$L(T_i|MRCRA = i) = l_{c^1(i)} + l_{c^2(i)} + L(T_{c^1(i)}|\sigma_{c^1(i)} = 1) + L(T_{c^2(i)}|\sigma_{c^2(i)} = 1) \quad (6)$$

where we have used  $L(T_k|\sigma_k = 1)$  to denote the BBLS of the subtree  $T_k$  conditioned on node  $k$  being in state 1 ( $\sigma_k = 1$ ). The condition  $\sigma_k = 1$  specifies that at least one of the child nodes of  $k$  has to be in state 1, which can be either node  $c^1(k)$  or  $c^2(k)$ , or both. Therefore,  $L(T_k|\sigma_k = 1)$  can be calculated recursively according to

$$\begin{aligned} L(T_k|\sigma_k = 1) &= [P(\sigma_{c^1(k)} = 1)P(\sigma_{c^2(k)} = 0)(l_{c^1(k)} + L(T_{c^1(k)}|\sigma_{c^1(k)} = 1)) + \\ &P(\sigma_{c^1(k)} = 0)P(\sigma_{c^2(k)} = 1)(l_{c^2(k)} + L(T_{c^2(k)}|\sigma_{c^2(k)} = 1)) + \\ &P(\sigma_{c^1(k)} = 1)P(\sigma_{c^2(k)} = 1)(l_{c^1(k)} + L(T_{c^1(k)}|\sigma_{c^1(k)} = 1) + \\ &l_{c^2(k)} + L(T_{c^2(k)}|\sigma_{c^2(k)} = 1))] / P(\sigma_k = 1) \end{aligned} \quad (7)$$

$$\begin{aligned} &= [P(\sigma_{c^1(k)} = 1)(l_{c^1(k)} + L(T_{c^1(k)}|\sigma_{c^1(k)} = 1)) + \\ &P(\sigma_{c^2(k)} = 1)(l_{c^2(k)} + L(T_{c^2(k)}|\sigma_{c^2(k)} = 1))] / P(\sigma_k = 1) \end{aligned} \quad (8)$$

If the effective branch length  $l_k^*$  is defined to be

$$l_k^* = l_k + L(T_k|\sigma_k = 1) \quad (9)$$

then we have the following recurrence for calculating  $l_k^*$

$$l_k^* = l_k + [P(\sigma_{c^1(k)} = 1)l_{c^1(k)}^* + P(\sigma_{c^2(k)} = 1)l_{c^2(k)}^*] / P(\sigma_k = 1) \quad (10)$$

Consequently, the BBLs in Eq. (2) can be calculated using:

$$BBLs(p_V) = \sum_{i=n+1}^N P(\sigma_{c^1(i)} = 1)P(\sigma_{c^2(i)} = 1)P(\sigma_{T_i^c} = 0)(l_{c^1(i)}^* + l_{c^2(i)}^*) \quad (11)$$

Note that to calculate each of the equations in 4, 5, and 11, we only need to traverse the tree once. Therefore, the new algorithm for calculating BBLs scale only linearly with the number of nodes in the tree.

## 1.2 An example

Next we illustrate the calculation of BBLs derived in Eq. (11) using an example phylogenetic tree shown in Figure 1. The tree consists of  $n = 4$  leaf nodes and 3 ancestral nodes. The probability of the leaf nodes being in state 1 is specified by  $p_i = P(\sigma_i = 1)$  for leaf node  $i$ . For simplicity, we have chosen  $p_i = 1/2$  for all  $i = 1, \dots, n$ .

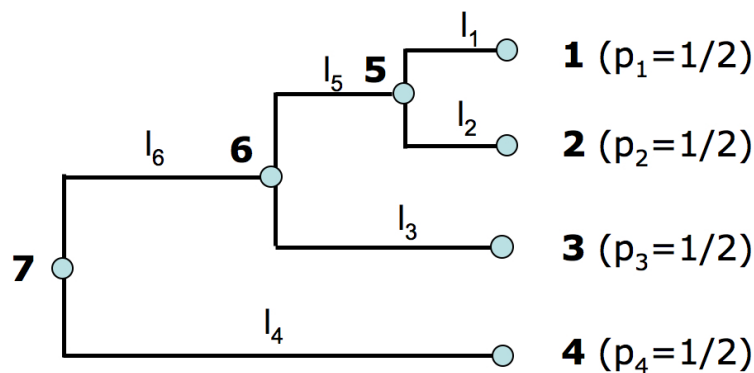

Figure 1: An example phylogenetic tree.

Next we first show detailed steps of calculating BBLs using Eq. (1), and then demonstrate how to calculate BBLs using Eq. (11) and compare the results obtained from the two approaches.

### 1.2.1 Computing BLS according to Eq. (1)

Under this approach, we list all potential combinations of leaf nodes and calculate their probabilities and their corresponding branch length scores. The phylogenetic tree in Figure 1 consists of 16 possible 0-1 configurations of the leaf nodes, with 11 configurations consisting of at least two 1s. The complete list of these combinations and their corresponding branch length scores are shown in the following table:

| $\sigma_1$ | $\sigma_2$ | $\sigma_3$ | $\sigma_4$ | Prob | BLS                                 |
|------------|------------|------------|------------|------|-------------------------------------|
| 1          | 1          | 0          | 0          | 1/16 | $l_1 + l_2$                         |
| 1          | 0          | 1          | 0          | 1/16 | $l_1 + l_3 + l_5$                   |
| 1          | 0          | 0          | 1          | 1/16 | $l_1 + l_4 + l_5 + l_6$             |
| 0          | 1          | 1          | 0          | 1/16 | $l_2 + l_3 + l_5$                   |
| 0          | 1          | 0          | 1          | 1/16 | $l_2 + l_4 + l_5 + l_6$             |
| 0          | 0          | 1          | 1          | 1/16 | $l_3 + l_4 + l_6$                   |
| 1          | 1          | 1          | 0          | 1/16 | $l_1 + l_2 + l_3 + l_5$             |
| 1          | 1          | 0          | 1          | 1/16 | $l_1 + l_2 + l_4 + l_5 + l_6$       |
| 1          | 0          | 1          | 1          | 1/16 | $l_1 + l_3 + l_4 + l_5 + l_6$       |
| 0          | 1          | 1          | 1          | 1/16 | $l_2 + l_3 + l_4 + l_5 + l_6$       |
| 1          | 1          | 1          | 1          | 1/16 | $l_1 + l_2 + l_3 + l_4 + l_5 + l_6$ |

According to Eq. (1), BBLS is the sum of the BLS shown in the last column of the above table, weighted by their corresponding probabilities in the second last column. This leads to

$$BBLS = \frac{1}{16}[7(l_1 + l_2 + l_3 + l_4 + l_6) + 9l_5] \quad (12)$$

### 1.3 Computing BBLS according to Eq. (11)

To apply Eq. (11), we first calculate  $P(\sigma_i = 1)$  and  $P(\sigma_{T_i^c} = 0)$  for  $i = 5$  and 6:

$$p_5 = P(\sigma_5 = 1) = 1 - (1 - p_1)(1 - p_2) = 3/4 \quad (13)$$

$$p_6 = P(\sigma_6 = 1) = 1 - (1 - p_3)(1 - p_5) = 7/8 \quad (14)$$

$$P(\sigma_{T_6^c} = 0) = P(\sigma_4 = 0) = 1/2 \quad (15)$$

$$P(\sigma_{T_5^c} = 0) = P(\sigma_{T_6^c} = 0)P(\sigma_3 = 0) = 1/4 \quad (16)$$

Next we calculate the effective branch length:

$$l_5^* = l_5 + (p_1 l_1 + p_2 l_2)/p_5 = l_5 + \frac{2}{3}(l_1 + l_2) \quad (17)$$

$$l_6^* = l_6 + (p_5 l_5^* + p_3 l_3)/p_6 = l_6 + \frac{2}{7}(2l_1 + 2l_2 + 2l_3 + 3l_5) \quad (18)$$

There are three potential MRCAs (5, 6 and 7) in the phylogenetic tree in Figure 1. Applying Eq. (11), we then have

$$BBLs = \sum_{i=5}^7 p_{c^1(i)} p_{c^2(i)} P(\sigma_{T_i^c} = 0) (l_{c^1(i)}^* + l_{c^2(i)}^*) \quad (19)$$

$$= \frac{1}{16}(l_1 + l_2) + \frac{3}{16}(l_3 + l_5^*) + \frac{7}{16}(l_4 + l_6^*) \quad (20)$$

$$= \frac{1}{16}[7(l_1 + l_2 + l_3 + l_6) + 9l_5] \quad (21)$$

which is the same as the BBLs derived from the first approach shown in Eq. (12).

#### 1.4 Log likelihood ratio $\log(P(x_i|x_{\pi(i)}, \sigma_i = 1)/P(x_i|x_{\pi(i)}, \sigma_i = 0))$

Consider the branch connecting the parent node  $\pi(i)$  to its child node  $i$ . If the sequences in the two nodes (denoted by  $x_{\pi(i)}$  and  $x_i$  respectively) are conserved, we suggest in the Methods that the log likelihood ratio score  $\log(P(x_i|x_{\pi(i)}, \sigma_i = 1)/P(x_i|x_{\pi(i)}, \sigma_i = 0))$  under the constrained model vs. neutral model should approximately scale linearly with the branch length ( $l_i$ ) between node  $\pi(i)$  and node  $i$ . Next we provide an explanation for this approximation.

Suppose the sequence evolution along the branch is modeled by the Jukes-Cantor model. For simplicity of discussion, we assume that the conserved sequences in the two nodes are identical ( $x_i = x_{\pi(i)}$ ). According to the Jukes-Cantor model, the chance of a sequence remaining unchanged over a period of  $T = l_i$  time units under the neutral evolution is

$$P(x_i|x_{\pi(i)}, \sigma_i = 0) = \frac{1}{4}(1 + 3e^{-4\alpha l_i}) \quad (22)$$

where  $\alpha$  is a rate parameter of the neutral evolution. For the evolution of the constrained sequence, it is often modeled by a slower rate of evolution, that is, to multiply the parameter  $\alpha$

with a number  $\gamma < 1$ , which leads to

$$P(x_i|x_{\pi(i)}, \sigma_i = 1) = \frac{1}{4}(1 + 3e^{-4\gamma\alpha t_i}) \quad (23)$$

The log ratio between the two likelihood is then

$$\log \frac{P(x_i|x_{\pi(i)}, \sigma_i = 1)}{P(x_i|x_{\pi(i)}, \sigma_i = 0)} = \log \frac{1 + 3e^{-4\gamma\alpha T}}{1 + 3e^{-4\alpha T}} \quad (24)$$

$$= 3\alpha(1 - \gamma)T + O((\alpha T)^2) \quad (25)$$

$$\sim T \quad (26)$$

where the approximation holds when the expected number of substitutions over the branch is small, which is true for closely related species such as the mammalian species we are considering.

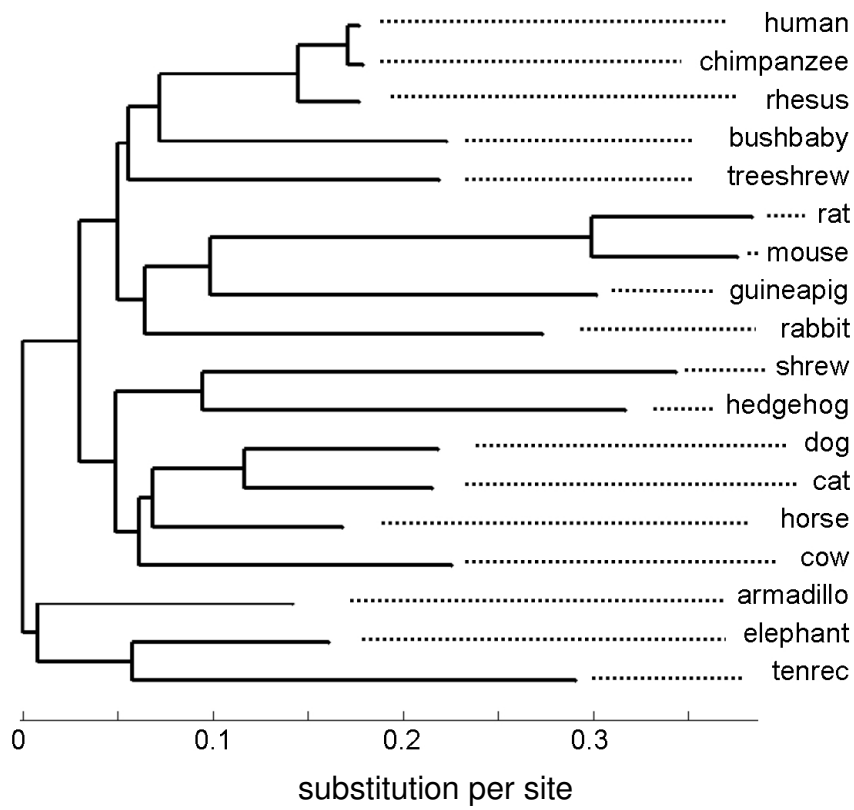

**Figure S1** Phylogenetic tree of 18 placental mammals with genomes available.

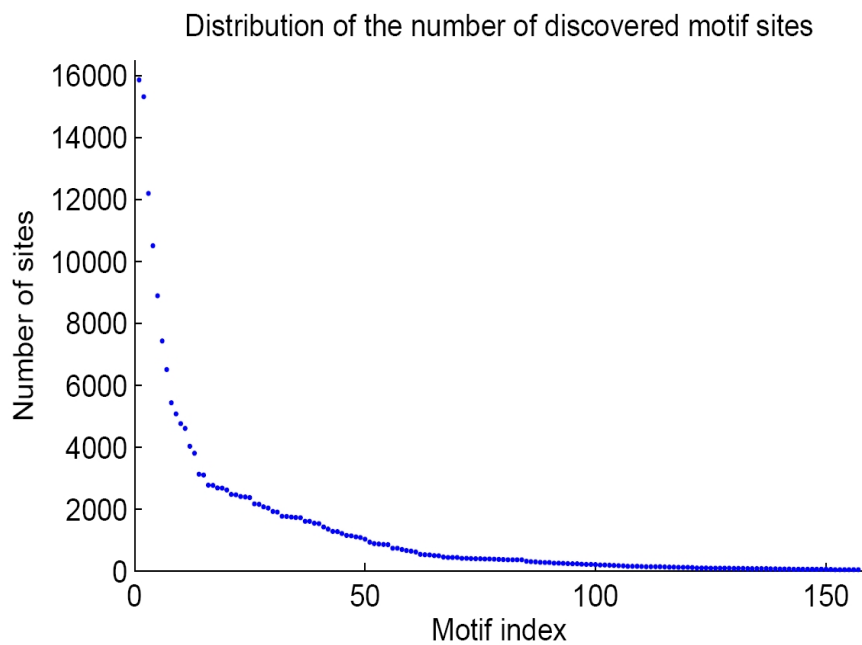

**Figure S2** Number of discovered sites for the 157 motifs with  $FDR \leq 0.1$ . Each dot represents one motif.



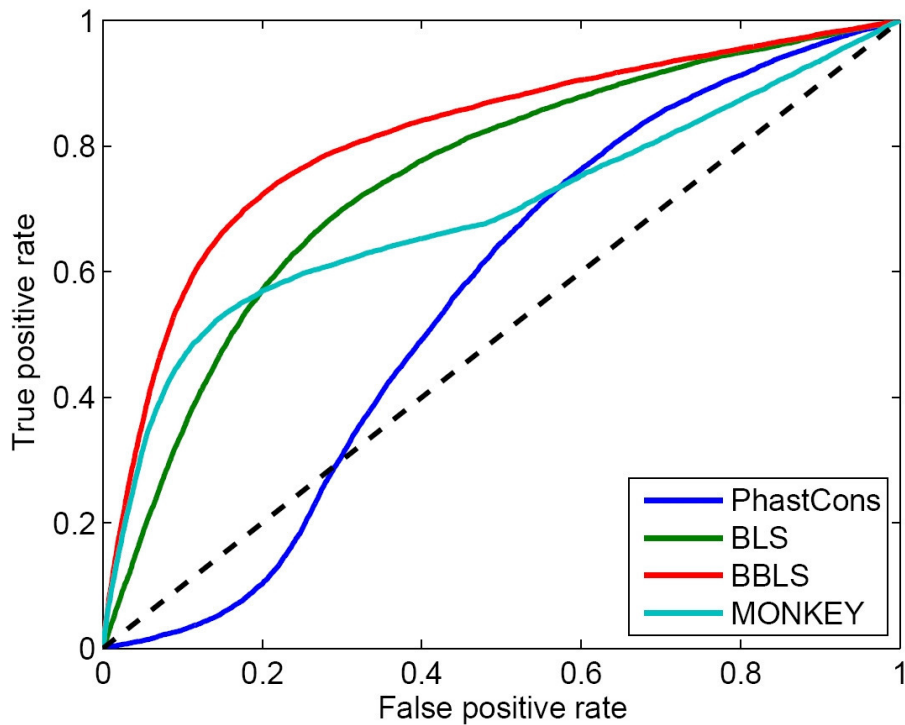

**Figure S3** ROC curves of different methods for predicting **CTCF** binding sites. PhastCons: PhastCons conservation score; BLS: Branch length score; BBLS: Bayesian branch length score; MONKEY: Conservation p-value calculated by MONKEY (Moses et al., 2004). Experimentally identified CTCF sites are from Kim et al. (2007) and Barski et al. (2007).

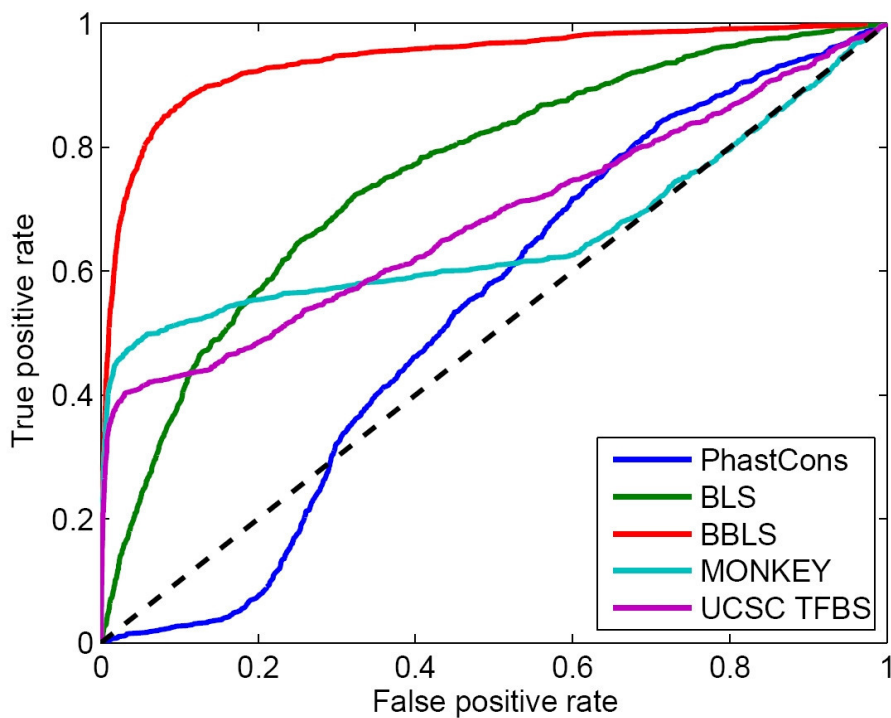

**Figure S4** ROC curves of different methods for predicting **NRSE** binding sites. PhastCons: PhastCons conservation score; BLS: Branch length score; BBLS: Bayesian branch length score; MONKEY: Conservation p-value calculated by MONKEY (Moses et al., 2004); UCSC TFBS: Predicted sites from UCSC genome browser. Experimentally identified NRSE sites are from Johnson et al. (2006).

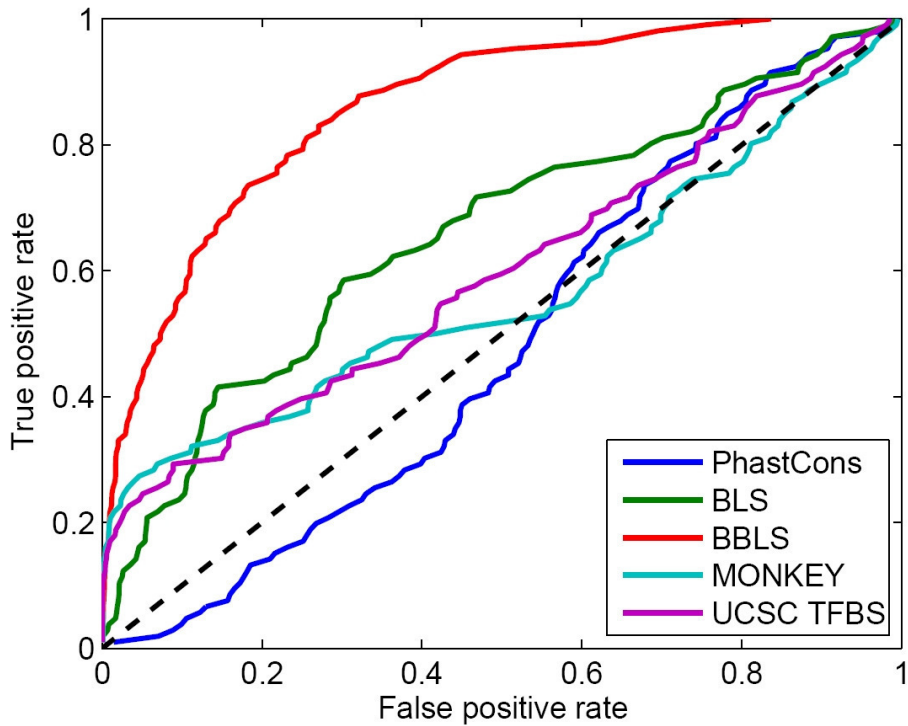

**Figure S5** ROC curves of different methods for predicting **P53** binding sites. PhastCons: PhastCons conservation score; BLS: Branch length score; BBLS: Bayesian branch length score; MONKEY: Conservation p-value calculated by MONKEY (Moses et al., 2004); UCSC TFBS: Predicted sites from UCSC genome browser. Experimentally predicted P53 sites are from Wei et al. (2006).

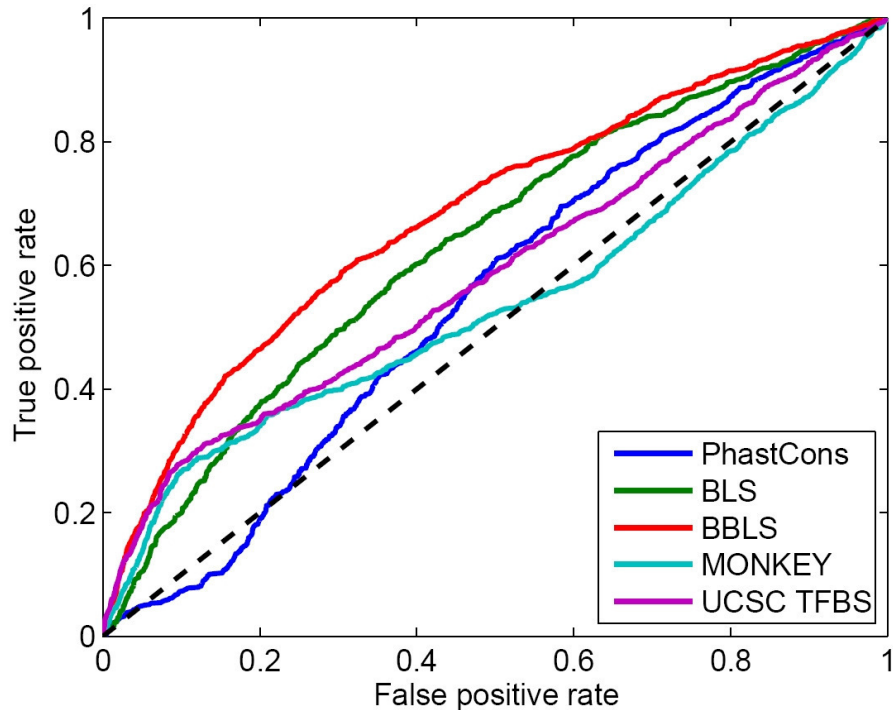

**Figure S6** ROC curves of different methods for predicting **MYC** binding sites. PhastCons: PhastCons conservation score; BLS: Branch length score; BBLS: Bayesian branch length score; MONKEY: Conservation p-value calculated by MONKEY (Moses et al., 2004); UCSC TFBS: Predicted sites from UCSC genome browser. Experimentally identified MYC sites are from Zeller et al. (2006).

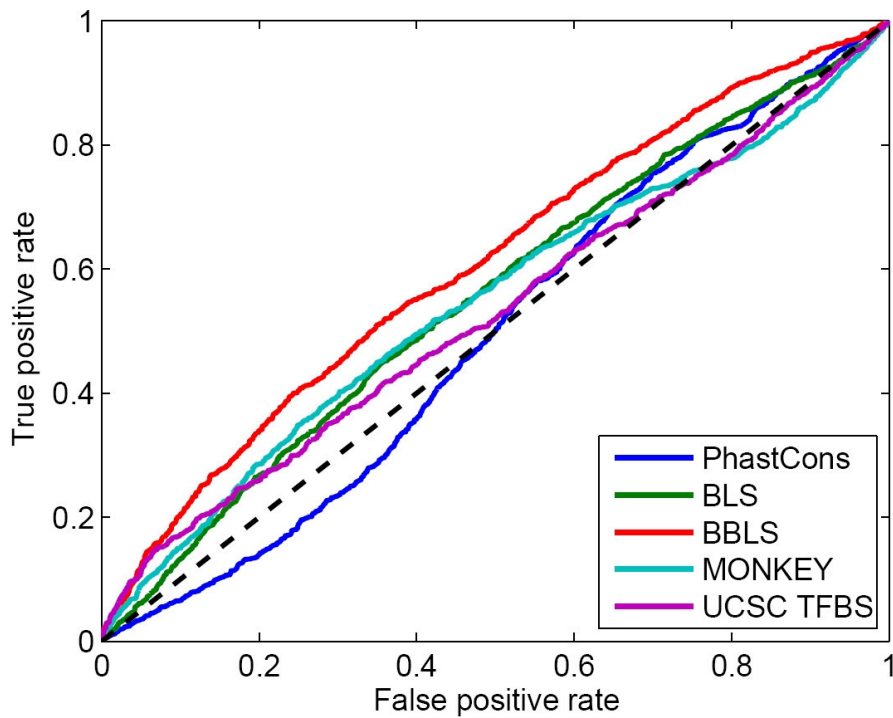

**Figure S7** ROC curves of different methods for predicting **STAT1** binding sites. PhastCons: PhastCons conservation score; BLS: Branch length score; BBLS: Bayesian branch length score; MONKEY: Conservation p-value calculated by MONKEY (Moses et al., 2004); UCSC TFBS: Predicted sites from UCSC genome browser. Experimentally identified STAT1 sites are from Robertson et al. (2007).

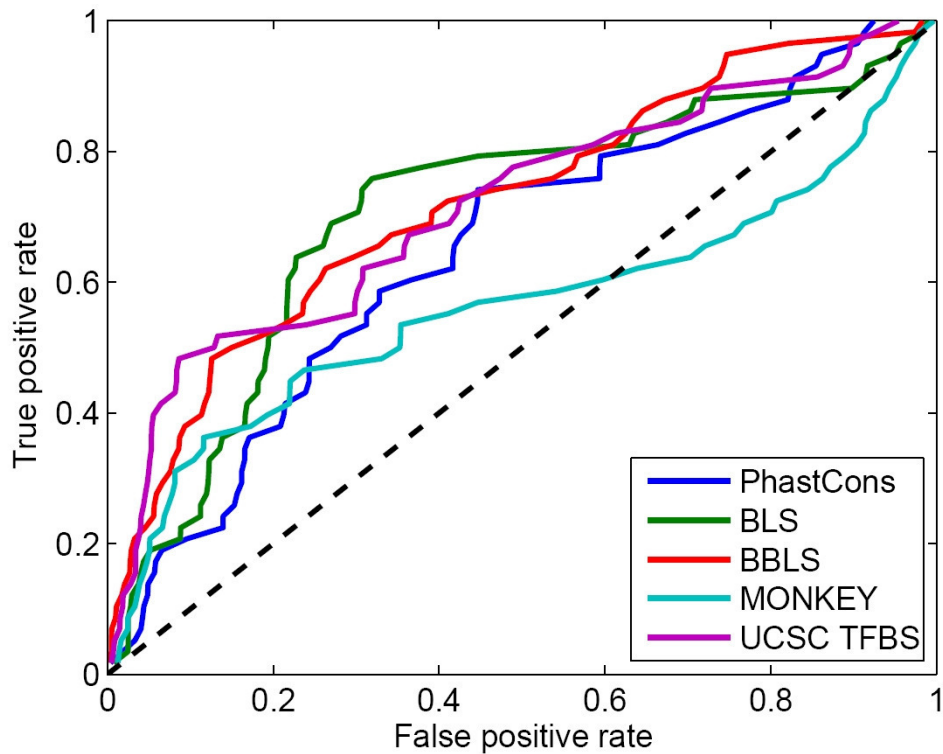

**Figure S8** ROC curves of different methods for predicting **NF-kappaB** binding sites. PhastCons: PhastCons conservation score; BLS: Branch length score; BBLS: Bayesian branch length score; MONKEY: Conservation p-value calculated by MONKEY (Moses et al., 2004); UCSC TFBS: Predicted sites from UCSC genome browser. Experimentally identified NF-kappaB sites are from Lim et al. (2005).

Figure S9 MotifMap web server user interface

File Edit View History Bookmarks Tools Help

http://motifmap.ics.uci.edu/#app=bbc6718-selectedIndex=1

Google Yahoo! New York Times splicing UCI UCI-ICS UCI-ICS UCSC Genome Published Dictionary perfunct Wolfram MathWorld Galaxy Java NIH (RFAs & PAs) UCI Registrar CS284A CS295

UC Irvine - ICS - Institute for Genomics and Bioinformatics

MotifMap > Search

Welcome Search Genome Browser Documentation

Motif information:

| Motif ID | Name  | Consensus         | Length |
|----------|-------|-------------------|--------|
| M00001   | MyoD  | VVDCASGTGBYD      | 12     |
| M00002   | E47   | VNSGCAGGTGK8BBB   | 15     |
| M00004   | c-Myb | BVVVBBRCVGTGGBBGG | 18     |
| M00005   | AP-4  | WWWHCAGCTGSDGNCNK | 18     |
| M00006   | MEF-2 | BTCTAAAATAAACYCY  | 16     |

Add to Genome Browser View Species: human

Genome location:

Parameters: Refresh Auto-refresh? BLS: 0 3 1.0 BLS: 0 3 0.5 FDR: 0 1 0.5

| Location                  | Strand | Normalized LOD Sc | Z score | BLS  | BELS  | FDR   | Gene         | Distance (bp) | Description                                                         |
|---------------------------|--------|-------------------|---------|------|-------|-------|--------------|---------------|---------------------------------------------------------------------|
| chr2:104238696-104238707  | -      | 0.971             | 4.851   | 2.85 | 2.637 | 0     | NM_138285    | 541468        | Homo sapiens nucleoporin 35kDa (NUP35), mRNA.                       |
| chr9:37950118-37950129    | +      | 0.99              | 4.701   | 2.81 | 2.615 | 0     | NM_033412    | -55768        | Homo sapiens mitochondrial carrier triple repeat 1 (MCART1), mRNA.  |
| chr7:12693580-12693591    | +      | 0.99              | 4.701   | 2.74 | 2.429 | 0     | NM_005738    | 194           | Homo sapiens ADP-ribosylation factor-like 4A (ARL4A), transcript    |
| chr2:119329874-119329885  | -      | 0.999             | 4.776   | 2.95 | 2.415 | 0     | NM_001426    | -7645         | Homo sapiens engrailed homolog 1 (EN1), mRNA.                       |
| chr5:153134693-153134704  | +      | 1                 | 4.782   | 2.61 | 2.37  | 0     | NM_005927    | -263959       | Homo sapiens microtubulin-associated protein 3 (MFAP3), mRNA.       |
| chr10:69661924-69661935   | +      | 0.99              | 4.701   | 2.45 | 2.298 | 0     | NM_145178    | -63           | Homo sapiens atonal homolog 7 (Drosophila) (ATOH7), mRNA.           |
| chr4:57693251-57693262    | -      | 0.99              | 4.701   | 2.62 | 2.279 | 0     | NM_001553    | -21955        | Homo sapiens insulin-like growth factor binding protein 7 (IGFBP7), |
| chr21:23255531-23255542   | +      | 0.99              | 4.701   | 2.59 | 2.256 | 0     | NM_004540    | 1963127       | Homo sapiens neural cell adhesion molecule 2 (NCAM2), mRNA.         |
| chr9:2866871-2866882      | +      | 1                 | 4.782   | 1.96 | 1.683 | 0.133 | NM_014878    | -32741        | Homo sapiens KIAA0020 (KIAA0020), mRNA.                             |
| chr12:118917589-118917600 | -      | 1                 | 4.782   | 2.3  | 1.711 | 0.143 | NM_207311    | 5658          | Homo sapiens hypothetical protein LOC92558 (LOC92558), mRNA.        |
| chr9:30512304-30512315    | -      | 1                 | 4.782   | 2.35 | 1.799 | 0.154 | NM_152570    | -1803001      | Homo sapiens hypothetical protein FLJ1810 (FLJ1810), mRNA.          |
| chr2:219431675-219431686  | -      | 1                 | 4.782   | 1.98 | 1.814 | 0.167 | NM_006522    | -1015         | Homo sapiens wingless-type MMTV integration site family, member 6   |
| chr5:41666004-41666015    | -      | 1                 | 4.782   | 1.98 | 1.359 | 0.167 | NM_001005473 | -119517       | -                                                                   |
| chr14:77153202-77153213   | +      | 0.999             | 4.776   | 1.66 | 1.395 | 0.174 | NM_004863    | -339          | Homo sapiens serine palmitoyltransferase, long chain base subunit 2 |

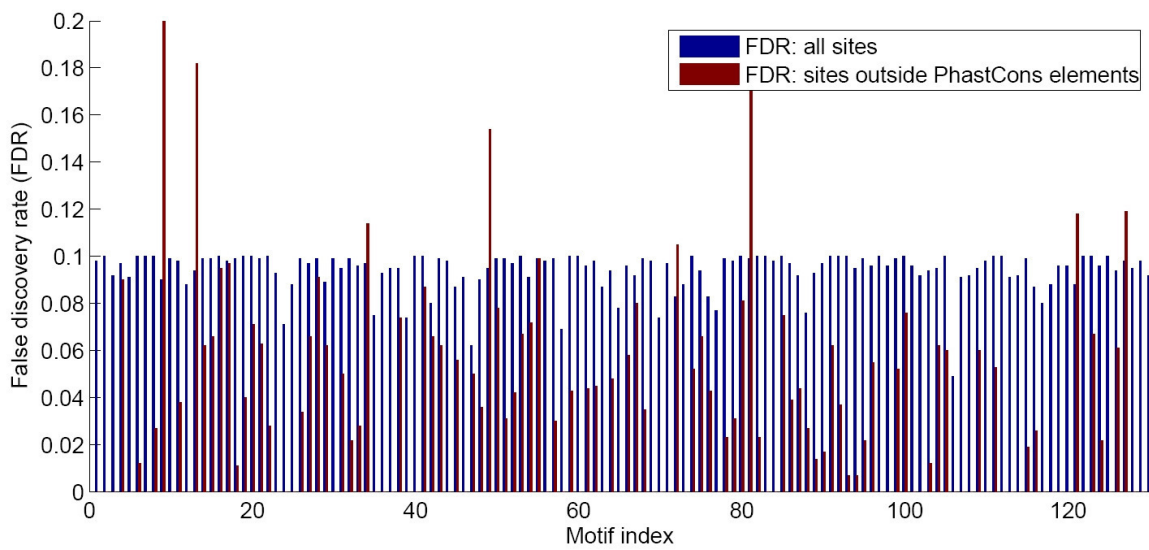

**Figure S10** False discovery rates (FDR) of predicted motif sites. Each bar presents one motif. Blue: FDR based on all predicted sites; Red: FDR based only on sites outside PhastCons elements.



Supplementary Table S1 List of motifs with FDR  $\leq$  0.1

| ID       | Name                               | Number of sites | FDR   | Motif score | BBLs  |
|----------|------------------------------------|-----------------|-------|-------------|-------|
| M00727   | SF-1                               | 15861           | 0.100 | 0.982       | 0.933 |
| LM1_RFX1 | LM1_RFX1                           | 15319           | 0.098 | 0.767       | 0.500 |
| LM2_CTCF | LM2_CTCF                           | 12195           | 0.091 | 0.741       | 0.667 |
| M00931   | Sp1                                | 10507           | 0.087 | 0.912       | 0.500 |
| M00281   | RFX1                               | 8893            | 0.096 | 0.776       | 0.733 |
| MA0004   | Arnt                               | 7434            | 0.098 | 0.874       | 1.433 |
| M00925   | AP-1                               | 6513            | 0.100 | 0.906       | 1.167 |
| M00510   | Lhx3                               | 5438            | 0.099 | 0.894       | 0.933 |
| MA0093   | USF1                               | 5081            | 0.100 | 0.950       | 1.133 |
| M00342   | 1-Oct                              | 4769            | 0.099 | 0.943       | 1.500 |
| M00173   | AP-1                               | 4607            | 0.099 | 0.957       | 0.500 |
| M00652   | Nrf-1                              | 4035            | 0.100 | 0.900       | 0.600 |
| MA0055   | Myf                                | 3808            | 0.098 | 0.858       | 0.967 |
| M00025   | Elk-1                              | 3130            | 0.099 | 0.811       | 0.667 |
| M00513   | ATF3                               | 3106            | 0.083 | 0.806       | 0.500 |
| MA0076   | ELK4                               | 2777            | 0.099 | 0.903       | 0.867 |
| M00532   | RP58                               | 2773            | 0.100 | 0.907       | 1.267 |
| M00933   | Sp1                                | 2691            | 0.096 | 0.934       | 1.200 |
| M01023   | HSF1                               | 2684            | 0.095 | 0.892       | 0.500 |
| MA0058   | MAX                                | 2623            | 0.099 | 0.924       | 1.033 |
| M00917   | CREB                               | 2482            | 0.099 | 0.825       | 0.833 |
| M00039   | CREB                               | 2467            | 0.097 | 0.945       | 1.033 |
| M00698   | HEB                                | 2415            | 0.100 | 0.989       | 1.867 |
| M00041   | CRE-BP1:c-Jun                      | 2396            | 0.100 | 0.939       | 0.667 |
| M00179   | CRE-BP1                            | 2381            | 0.100 | 0.893       | 0.567 |
| LM4_M2   | LM4_M2                             | 2176            | 0.094 | 0.790       | 0.500 |
| M00932   | Sp1                                | 2161            | 0.076 | 0.959       | 0.500 |
| M00615   | c-Myc:Max                          | 2082            | 0.100 | 0.838       | 0.833 |
| M00795   | Octamer                            | 2040            | 0.098 | 0.959       | 1.433 |
| M00981   | CREBATF                            | 1931            | 0.099 | 0.959       | 0.933 |
| M00287   | NF-Y                               | 1913            | 0.094 | 0.804       | 1.167 |
| M00985   | Stra13                             | 1773            | 0.100 | 0.868       | 0.767 |
| MA0060   | NF-Y                               | 1764            | 0.093 | 0.807       | 1.200 |
| M01068   | UF1H3BETA                          | 1750            | 0.095 | 0.894       | 0.567 |
| M00539   | Arnt                               | 1734            | 0.095 | 0.757       | 0.800 |
| M00280   | RFX1                               | 1730            | 0.099 | 0.879       | 1.067 |
| M00119   | Max                                | 1614            | 0.100 | 0.877       | 0.933 |
| M00338   | ATF                                | 1610            | 0.097 | 0.900       | 0.800 |
| M00465   | POU6F1                             | 1547            | 0.097 | 0.870       | 1.000 |
| M00176   | AP-4                               | 1537            | 0.100 | 0.968       | 1.800 |
| MA0062   | GABPA                              | 1426            | 0.097 | 0.936       | 0.933 |
| LM9_NRSE | LM9_NRSE                           | 1360            | 0.087 | 0.797       | 0.500 |
| M00256   | NRSF                               | 1283            | 0.094 | 0.775       | 0.533 |
| M00511   | ERR                                | 1276            | 0.080 | 0.976       | 0.500 |
| M00070   | Tal-1beta:ITF-2                    | 1215            | 0.100 | 0.890       | 1.133 |
| M00418   | TGIF                               | 1160            | 0.100 | 0.956       | 1.700 |
| MA0088   | Staf                               | 1146            | 0.099 | 0.893       | 0.533 |
| M01028   | NRSF                               | 1110            | 0.099 | 0.827       | 0.600 |
| M00916   | CREB                               | 1086            | 0.099 | 0.800       | 1.067 |
| M00121   | USF                                | 1034            | 0.099 | 0.912       | 0.933 |
| M00032   | c-Ets-1(p54)                       | 941             | 0.091 | 0.970       | 1.467 |
| M00177   | CREB                               | 894             | 0.096 | 0.814       | 1.200 |
| M00279   | MIF-1                              | 880             | 0.100 | 0.850       | 1.000 |
| M00325   | neural-restr.-<br>silencer-element | 863             | 0.095 | 0.808       | 0.500 |
| M01035   | YY1                                | 859             | 0.100 | 0.950       | 1.133 |
| M00231   | MEF-2                              | 744             | 0.099 | 0.767       | 1.067 |
| M00178   | CREB                               | 741             | 0.100 | 0.958       | 0.933 |
| M00037   | NF-E2                              | 700             | 0.097 | 0.988       | 0.833 |
| M00017   | ATF                                | 665             | 0.096 | 0.903       | 1.000 |
| MA0091   | TAL1-TCF3                          | 651             | 0.095 | 0.944       | 1.567 |
| M01058   | GF11B                              | 622             | 0.100 | 0.945       | 0.933 |
| M00187   | USF                                | 546             | 0.099 | 0.995       | 0.500 |
| M00639   | HNF-6                              | 535             | 0.097 | 0.992       | 0.867 |
| MA0065   | PPARG-RXRA                         | 523             | 0.096 | 0.830       | 0.933 |
| M00420   | MEIS1A:HOXA9                       | 505             | 0.095 | 0.895       | 1.133 |
| M00210   | OCT-x                              | 502             | 0.100 | 0.902       | 1.667 |
| M00821   | Nrf2                               | 457             | 0.096 | 0.934       | 1.367 |
| M01031   | HNF4                               | 446             | 0.094 | 0.827       | 1.500 |
| M00174   | AP-1                               | 443             | 0.099 | 0.994       | 1.200 |
| M00941   | MEF-2                              | 442             | 0.100 | 0.895       | 1.467 |
| M00118   | c-Myc:Max                          | 420             | 0.100 | 0.897       | 0.533 |
| M00188   | AP-1                               | 420             | 0.095 | 0.964       | 1.700 |
| M00793   | YY1                                | 411             | 0.092 | 0.986       | 1.867 |
| M00775   | NF-Y                               | 406             | 0.099 | 0.982       | 0.767 |
| M00339   | c-Ets-1                            | 404             | 0.089 | 0.965       | 0.500 |
| M00641   | HSF                                | 399             | 0.100 | 0.978       | 0.500 |
| MA0028   | ELK1                               | 394             | 0.096 | 0.879       | 1.833 |
| MA0017   | NR2F1                              | 387             | 0.098 | 0.914       | 1.333 |
| M00196   | Sp1                                | 381             | 0.100 | 0.957       | 1.367 |
| M00691   | ATF-1                              | 379             | 0.100 | 0.967       | 0.667 |

|        |                |     |       |       |       |
|--------|----------------|-----|-------|-------|-------|
| M00526 | GCNF           | 371 | 0.097 | 0.891 | 0.500 |
| M00762 | PPAR,          | 368 | 0.098 | 0.912 | 1.467 |
| M00341 | GABP           | 368 | 0.092 | 0.942 | 1.300 |
| M00771 | ETS            | 367 | 0.098 | 0.975 | 1.167 |
| M00437 | CHX10          | 324 | 0.099 | 0.796 | 1.633 |
| M00161 | 1-Oct          | 306 | 0.098 | 0.940 | 1.667 |
| M00774 | NF-kappaB      | 304 | 0.092 | 0.899 | 1.333 |
| M00065 | Tal-1beta:E47  | 285 | 0.098 | 0.880 | 1.467 |
| MA0059 | MYC-MAX        | 284 | 0.092 | 0.955 | 0.867 |
| M00517 | AP-1           | 279 | 0.100 | 0.954 | 1.500 |
| M00930 | 1-Oct          | 261 | 0.100 | 0.891 | 2.167 |
| MA0114 | HNF4           | 258 | 0.093 | 0.939 | 1.533 |
| M00514 | ATF4           | 253 | 0.095 | 0.950 | 1.100 |
| M00512 | PPARG          | 245 | 0.090 | 0.848 | 0.900 |
| M00224 | STAT1          | 240 | 0.100 | 0.850 | 0.500 |
| M00138 | 1-Oct          | 239 | 0.075 | 0.828 | 0.867 |
| M00122 | USF            | 228 | 0.088 | 0.968 | 1.200 |
| M00528 | PPAR           | 223 | 0.090 | 0.753 | 1.333 |
| M00421 | MEIS1B:HOXA9   | 220 | 0.100 | 0.939 | 1.467 |
| M00799 | Myc            | 212 | 0.094 | 0.883 | 2.600 |
| M00763 | PPAR           | 202 | 0.099 | 0.969 | 1.000 |
| M00069 | YY1            | 197 | 0.091 | 0.850 | 1.067 |
| M00113 | CREB           | 195 | 0.092 | 0.808 | 1.567 |
| M00626 | RFX1           | 188 | 0.096 | 0.947 | 1.033 |
| M00157 | ROAlpha2       | 181 | 0.088 | 0.827 | 2.133 |
| M00993 | TAL1           | 171 | 0.094 | 0.994 | 2.233 |
| M00066 | Tal-1alpha:E47 | 160 | 0.100 | 0.906 | 1.667 |
| M00193 | NF-1           | 160 | 0.100 | 0.934 | 1.300 |
| M00184 | MyoD           | 160 | 0.100 | 0.889 | 2.467 |
| M00236 | Arnt           | 151 | 0.093 | 0.785 | 1.400 |
| M00927 | AP-4           | 145 | 0.097 | 0.996 | 2.433 |
| M00175 | AP-4           | 144 | 0.097 | 0.999 | 1.800 |
| M00796 | USF            | 144 | 0.097 | 0.961 | 1.233 |
| M00972 | IRF            | 143 | 0.098 | 0.907 | 1.667 |
| M00108 | NRF-2          | 137 | 0.088 | 0.976 | 1.667 |
| M00965 | LXR,           | 133 | 0.090 | 0.910 | 0.900 |
| M00765 | COUP           | 131 | 0.092 | 0.916 | 1.667 |
| M00135 | 1-Oct          | 128 | 0.094 | 0.901 | 1.700 |
| M01036 | COUPTF         | 125 | 0.096 | 0.846 | 1.000 |
| M00516 | E2F            | 123 | 0.098 | 0.957 | 0.833 |
| M00982 | KROX           | 122 | 0.049 | 0.977 | 0.500 |
| MA0107 | RELA           | 107 | 0.093 | 0.996 | 2.233 |
| M00405 | MEF-2          | 102 | 0.098 | 0.940 | 0.967 |
| M00220 | SREBP-1        | 102 | 0.098 | 0.965 | 1.400 |
| M00407 | RSRFC4         | 101 | 0.099 | 0.952 | 1.000 |
| M00134 | HNF-4          | 101 | 0.099 | 0.899 | 1.300 |
| M01022 | LEF1           | 100 | 0.100 | 0.986 | 2.167 |
| M00983 | MAF            | 100 | 0.100 | 0.985 | 2.000 |
| M00006 | MEF-2          | 96  | 0.083 | 0.920 | 1.033 |
| MA0115 | NR1H2-RXR      | 91  | 0.088 | 0.875 | 1.033 |
| M00422 | FOXJ2          | 89  | 0.090 | 0.903 | 1.633 |
| M00638 | HNF-4alpha     | 89  | 0.090 | 0.950 | 1.867 |
| M00084 | MZF1           | 87  | 0.069 | 0.992 | 0.767 |
| M01012 | HNF3           | 84  | 0.071 | 0.941 | 1.133 |
| M00450 | Zic3           | 84  | 0.095 | 0.862 | 2.567 |
| M00978 | LEF1TCF1       | 83  | 0.096 | 0.990 | 2.300 |
| M00649 | MAZ            | 82  | 0.098 | 0.960 | 2.633 |
| MA0113 | NR3C1          | 81  | 0.099 | 0.939 | 0.733 |
| M00406 | MEF-2          | 78  | 0.077 | 0.945 | 1.067 |
| M00922 | SRF            | 69  | 0.087 | 0.931 | 1.533 |
| MA0007 | Ar             | 68  | 0.088 | 0.897 | 0.800 |
| M00457 | STAT5A         | 68  | 0.088 | 0.978 | 1.000 |
| M00920 | E2F            | 66  | 0.091 | 0.952 | 1.033 |
| M00007 | Elk-1          | 66  | 0.091 | 0.954 | 0.867 |
| M00225 | STAT3          | 65  | 0.092 | 0.882 | 0.600 |
| M00460 | STAT5A         | 65  | 0.062 | 0.887 | 0.500 |
| M00284 | TCF11:MatG     | 64  | 0.094 | 0.862 | 1.333 |
| M00005 | AP-4           | 64  | 0.094 | 0.951 | 0.500 |
| M00764 | HNF-4          | 63  | 0.095 | 0.984 | 0.967 |
| MA0119 | Hox11-CTF1     | 62  | 0.097 | 0.898 | 1.767 |
| MA0072 | RORA1          | 60  | 0.100 | 0.984 | 1.933 |
|        | PPARalpha:RXR- |     |       |       |       |
| M00518 | alpha          | 54  | 0.074 | 0.910 | 1.167 |
| M00411 | HNF-4alpha1    | 54  | 0.074 | 0.962 | 1.100 |
| M00448 | Zic1           | 53  | 0.075 | 0.883 | 2.567 |
| MA0018 | CREB1          | 51  | 0.078 | 0.966 | 1.633 |
| M00956 | AR             | 50  | 0.080 | 0.850 | 0.833 |
| M00378 | Pax-4          | 50  | 0.080 | 0.896 | 1.967 |

Supplementary Table S2 List of motifs with FDR ≤ 0.5

| ID            | Name            | Number of sites | FDR   | Motif score | BLS   |
|---------------|-----------------|-----------------|-------|-------------|-------|
| M00993        | TAL1            | 37249           | 0.449 | 0.864       | 0.500 |
| M00727        | SF-1            | 25115           | 0.289 | 0.872       | 0.500 |
| M00698        | HEB             | 22752           | 0.305 | 0.849       | 0.500 |
| M00342        | 1-Oct           | 20695           | 0.267 | 0.853       | 0.500 |
| M00199        | AP-1            | 17887           | 0.494 | 0.900       | 0.500 |
| JASPAR_MA0071 | RORA            | 16777           | 0.427 | 0.853       | 0.500 |
| M00933        | Sp1             | 16575           | 0.439 | 0.804       | 0.500 |
| M00749        | SREBP-1         | 16561           | 0.484 | 0.877       | 0.500 |
| M00511        | ERR             | 16410           | 0.382 | 0.836       | 0.500 |
| LM1_RFX1      | LM1_RFX1        | 15579           | 0.102 | 0.707       | 0.500 |
| TBX           | TBX             | 15392           | 0.324 | 0.877       | 0.500 |
| LM2_CTCF      | LM2_CTCF        | 15245           | 0.163 | 0.741       | 0.500 |
| M00649        | MAZ             | 14385           | 0.398 | 0.860       | 0.500 |
| M00176        | AP-4            | 13578           | 0.299 | 0.878       | 0.500 |
| M00973        | E2A             | 13549           | 0.462 | 0.978       | 0.500 |
| M00196        | Sp1             | 13484           | 0.398 | 0.777       | 0.500 |
| M00418        | TGIF            | 13410           | 0.249 | 0.856       | 0.500 |
| M00532        | RP58            | 13217           | 0.268 | 0.817       | 0.500 |
| JASPAR_MA0002 | RUNX1           | 13064           | 0.500 | 0.894       | 1.000 |
| M00931        | Sp1             | 13035           | 0.327 | 0.782       | 0.500 |
| M00932        | Sp1             | 12886           | 0.392 | 0.779       | 0.500 |
| JASPAR_MA0093 | USF1            | 12857           | 0.135 | 0.840       | 0.500 |
| M00722        | core-binding    | 12817           | 0.494 | 0.908       | 1.133 |
| M00281        | RFX1            | 12639           | 0.174 | 0.776       | 0.500 |
| JASPAR_MA0104 | Mycn            | 12638           | 0.302 | 0.867       | 0.500 |
| JASPAR_MA0004 | Arnt            | 12463           | 0.130 | 0.874       | 0.500 |
| M00174        | AP-1            | 12055           | 0.500 | 0.864       | 0.600 |
| M00490        | Bach2           | 11970           | 0.498 | 0.822       | 0.533 |
| JASPAR_MA0091 | TAL1-TCF3       | 11930           | 0.276 | 0.834       | 0.500 |
| M00437        | CHX10           | 11399           | 0.408 | 0.796       | 0.500 |
| M00517        | AP-1            | 11334           | 0.305 | 0.824       | 0.500 |
| M00037        | NF-E2           | 11290           | 0.311 | 0.828       | 0.500 |
| M00070        | Tal-1beta:ITF-2 | 11239           | 0.280 | 0.780       | 0.500 |
| JASPAR_MA0031 | FOXO1           | 11171           | 0.498 | 0.906       | 1.167 |
| M00925        | AP-1            | 10942           | 0.157 | 0.906       | 0.500 |
| M00457        | STAT5A          | 10824           | 0.265 | 0.828       | 0.500 |
| M00065        | Tal-1beta:E47   | 10599           | 0.283 | 0.770       | 0.500 |
| M00720        | CAC-binding     | 10393           | 0.143 | 0.901       | 0.500 |
| M00795        | Octamer         | 10167           | 0.202 | 0.879       | 0.500 |
| M00066        | Tal-1alpha:E47  | 10105           | 0.300 | 0.796       | 0.500 |
| JASPAR_MA0006 | Arnt-Ahr        | 9589            | 0.482 | 0.878       | 0.500 |
| M00695        | ETF             | 9574            | 0.441 | 0.992       | 0.500 |
| M00495        | Bach1           | 9534            | 0.486 | 0.766       | 0.500 |
| M00210        | OCT-x           | 9470            | 0.378 | 0.812       | 0.500 |
| M00775        | NF-Y            | 9266            | 0.275 | 0.852       | 0.500 |
| JASPAR_MA0119 | Hox11-CTF1      | 8908            | 0.375 | 0.728       | 0.500 |
| M00652        | Nrf-1           | 8906            | 0.334 | 0.750       | 0.500 |
| JASPAR_MA0099 | Fos             | 8905            | 0.483 | 0.911       | 0.500 |
| M00806        | NF-1            | 8780            | 0.477 | 0.802       | 0.500 |
| JASPAR_MA0055 | Myf             | 8623            | 0.196 | 0.858       | 0.500 |
| M01058        | GF1B            | 8566            | 0.216 | 0.815       | 0.500 |
| M00793        | YY1             | 8542            | 0.377 | 0.886       | 0.500 |
| M00459        | STAT5B          | 8492            | 0.288 | 0.816       | 0.500 |
| M00188        | AP-1            | 8379            | 0.499 | 0.864       | 0.567 |
| M00008        | Sp1             | 8338            | 0.497 | 0.861       | 0.600 |
| M00157        | RORalpha2       | 8328            | 0.494 | 0.897       | 0.600 |
| M00055        | N-Myc           | 8210            | 0.457 | 0.790       | 0.500 |
| M00510        | Lhx3            | 8119            | 0.128 | 0.894       | 0.500 |
| JASPAR_MA0072 | RORA1           | 8018            | 0.476 | 0.824       | 0.633 |
| M00135        | 1-Oct           | 7775            | 0.303 | 0.781       | 0.500 |
| M00193        | NF-1            | 7684            | 0.406 | 0.794       | 0.500 |
| M00771        | ETS             | 7681            | 0.231 | 0.855       | 0.500 |
| JASPAR_MA0114 | HNF4            | 7650            | 0.305 | 0.829       | 0.500 |
| JASPAR_MA0090 | TEAD            | 7550            | 0.219 | 0.822       | 0.500 |
| M00287        | NF-Y            | 7541            | 0.340 | 0.804       | 0.500 |
| M00032        | c-Ets-1(p54)    | 7538            | 0.321 | 0.880       | 0.500 |
| JASPAR_MA0060 | NF-Y            | 7516            | 0.493 | 0.807       | 0.500 |
| M01031        | HNF4            | 7503            | 0.252 | 0.827       | 0.500 |
| M00052        | NF-kappaB       | 7429            | 0.499 | 0.836       | 0.833 |
| M00002        | E47             | 7296            | 0.456 | 0.817       | 0.500 |
| M00651        | NF-muE1         | 7190            | 0.495 | 0.886       | 0.667 |
| JASPAR_MA0048 | NHLH1           | 7033            | 0.454 | 0.779       | 0.500 |
| M00804        | E2A             | 7023            | 0.428 | 0.830       | 0.500 |
| M00223        | STATx           | 6964            | 0.132 | 0.876       | 0.500 |
| JASPAR_MA0107 | RELA            | 6752            | 0.495 | 0.916       | 0.767 |
| JASPAR_MA0058 | MAX             | 6728            | 0.178 | 0.824       | 0.500 |
| M00280        | RFX1            | 6604            | 0.394 | 0.789       | 0.500 |
| M00924        | AP-1            | 6596            | 0.499 | 0.853       | 0.567 |
| M00799        | Myc             | 6524            | 0.215 | 0.883       | 0.500 |
| M00421        | MEIS1B:HOXA9    | 6460            | 0.469 | 0.799       | 0.600 |

|               |              |      |       |       |       |
|---------------|--------------|------|-------|-------|-------|
| M00277        | Lmo2         | 6456 | 0.385 | 0.858 | 0.500 |
| M00774        | NF-kappaB    | 6439 | 0.381 | 0.789 | 0.500 |
| M00121        | USF          | 6438 | 0.349 | 0.772 | 0.500 |
| M00762        | PPAR,        | 6389 | 0.354 | 0.822 | 0.500 |
| JASPAR_MA0059 | MYC-MAX      | 6366 | 0.391 | 0.785 | 0.500 |
| M00175        | AP-4         | 6253 | 0.263 | 0.899 | 0.500 |
| M01034        | Ebox         | 6225 | 0.500 | 0.941 | 0.633 |
| M00340        | c-Ets-2      | 6118 | 0.386 | 0.864 | 0.500 |
| M00927        | AP-4         | 6036 | 0.227 | 0.906 | 0.500 |
| M00217        | USF          | 5999 | 0.353 | 0.872 | 0.500 |
| M00641        | HSF          | 5983 | 0.273 | 0.788 | 0.500 |
| M00639        | HNF-6        | 5981 | 0.401 | 0.892 | 0.500 |
| M00187        | USF          | 5975 | 0.390 | 0.855 | 0.500 |
| M00481        | AR           | 5975 | 0.500 | 0.756 | 0.533 |
| M00701        | SMAD-3       | 5926 | 0.497 | 0.978 | 0.767 |
| M00978        | LEF1/TCF1    | 5921 | 0.491 | 0.890 | 0.733 |
| M00778        | AhR          | 5917 | 0.468 | 0.809 | 0.500 |
| M00136        | 1-Oct        | 5894 | 0.469 | 0.836 | 0.500 |
| M00930        | 1-Oct        | 5809 | 0.209 | 0.891 | 0.500 |
| M00341        | GABP         | 5785 | 0.352 | 0.812 | 0.500 |
| M00339        | c-Ets-1      | 5779 | 0.228 | 0.845 | 0.500 |
| M00414        | AREB6        | 5627 | 0.491 | 0.828 | 0.767 |
| M00982        | KROX         | 5609 | 0.491 | 0.817 | 0.500 |
| NKX25_V2      | NKX25_       | 5590 | 0.496 | 0.826 | 0.567 |
| M00420        | MEIS1A:HOXA9 | 5583 | 0.286 | 0.785 | 0.500 |
| M00173        | AP-1         | 5497 | 0.120 | 0.877 | 0.500 |
| M00615        | c-Myc:Max    | 5442 | 0.203 | 0.748 | 0.500 |
| M01068        | UF1H3BETA    | 5418 | 0.367 | 0.724 | 0.500 |
| M00531        | NERF1a       | 5318 | 0.243 | 0.805 | 0.500 |
| M00231        | MEF-2        | 5254 | 0.246 | 0.767 | 0.500 |
| M00981        | CREBATF      | 5249 | 0.216 | 0.839 | 0.500 |
| M00026        | RSRFC4       | 5240 | 0.480 | 0.813 | 0.500 |
| M00528        | PPAR         | 5170 | 0.378 | 0.753 | 0.500 |
| M00108        | NRF-2        | 5151 | 0.388 | 0.836 | 0.500 |
| JASPAR_MA0062 | GABPA        | 5151 | 0.268 | 0.836 | 0.500 |
| M00821        | Nrf2         | 5081 | 0.302 | 0.834 | 0.500 |
| M00246        | Egr-2        | 4972 | 0.406 | 0.745 | 0.500 |
| M00184        | MyoD         | 4965 | 0.479 | 0.889 | 1.067 |
| M00119        | Max          | 4796 | 0.163 | 0.787 | 0.500 |
| M00769        | AML          | 4749 | 0.491 | 0.829 | 0.700 |
| M00619        | Aix-4        | 4723 | 0.396 | 0.709 | 0.500 |
| M00691        | ATF-1        | 4713 | 0.448 | 0.817 | 0.500 |
| M00985        | Stra13       | 4596 | 0.212 | 0.778 | 0.500 |
| M01022        | LEF1         | 4593 | 0.438 | 0.896 | 0.500 |
| M00763        | PPAR         | 4582 | 0.463 | 0.839 | 0.500 |
| M01035        | YY1          | 4566 | 0.426 | 0.850 | 0.500 |
| JASPAR_MA0065 | PPARG-RXRA   | 4541 | 0.357 | 0.710 | 0.500 |
| M00526        | GCNF         | 4424 | 0.262 | 0.721 | 0.500 |
| M00161        | 1-Oct        | 4407 | 0.285 | 0.860 | 0.500 |
| JASPAR_MA0115 | NR1H2-RXR    | 4285 | 0.477 | 0.695 | 0.500 |
| M00765        | COUP         | 4284 | 0.482 | 0.786 | 0.700 |
| M00338        | ATF          | 4282 | 0.279 | 0.780 | 0.500 |
| M00678        | Tel-2        | 4279 | 0.495 | 0.923 | 0.800 |
| JASPAR_MA0076 | ELK4         | 4278 | 0.184 | 0.813 | 0.500 |
| M00258        | ISRE         | 4232 | 0.413 | 0.779 | 0.500 |
| M00005        | AP-4         | 4164 | 0.310 | 0.791 | 0.500 |
| M00449        | Zic2         | 4159 | 0.495 | 0.914 | 0.667 |
| M01023        | HSF1         | 4101 | 0.130 | 0.812 | 0.500 |
| M00006        | MEF-2        | 4060 | 0.390 | 0.760 | 0.500 |
| M00025        | Elk-1        | 4037 | 0.125 | 0.811 | 0.500 |
| M00406        | MEF-2        | 4023 | 0.349 | 0.785 | 0.500 |
| M00232        | MEF-2        | 4009 | 0.481 | 0.778 | 0.567 |
| M00512        | PPARG        | 3987 | 0.308 | 0.698 | 0.500 |
| M00071        | E47          | 3959 | 0.485 | 0.814 | 0.767 |
| M01047        | AP-2alphaA   | 3954 | 0.475 | 0.752 | 0.500 |
| M00194        | NF-kappaB    | 3877 | 0.489 | 0.805 | 0.633 |
| M00039        | CREB         | 3839 | 0.195 | 0.845 | 0.500 |
| M00178        | CREB         | 3825 | 0.300 | 0.818 | 0.500 |
| M00118        | c-Myc:Max    | 3772 | 0.314 | 0.747 | 0.500 |
| M00017        | ATF          | 3770 | 0.306 | 0.783 | 0.500 |
| M00539        | Arnt         | 3676 | 0.176 | 0.757 | 0.500 |
| M00917        | CREB         | 3657 | 0.182 | 0.825 | 0.500 |
| M00983        | MAF          | 3655 | 0.401 | 0.875 | 0.500 |
| M00411        | HNF-4alpha1  | 3633 | 0.486 | 0.772 | 0.700 |
| M00959        | ER           | 3629 | 0.497 | 0.842 | 0.767 |
| JASPAR_MA0050 | IRF1         | 3628 | 0.398 | 0.839 | 0.500 |
| M00929        | MyoD         | 3581 | 0.342 | 0.775 | 0.500 |
| M00378        | Pax-4        | 3559 | 0.229 | 0.896 | 0.500 |
| M00693        | E12          | 3552 | 0.498 | 0.931 | 0.933 |
| JASPAR_MA0017 | NR2F1        | 3546 | 0.215 | 0.844 | 0.500 |
| M00158        | COUP-TF,     | 3546 | 0.455 | 0.844 | 0.500 |
| M00195        | 1-Oct        | 3543 | 0.470 | 0.842 | 0.733 |
| M00483        | ATF6         | 3498 | 0.463 | 0.795 | 0.500 |
| M00243        | Egr-1        | 3492 | 0.497 | 0.752 | 0.533 |

|               |                                    |      |       |       |       |
|---------------|------------------------------------|------|-------|-------|-------|
| M00123        | c-Myc:Max                          | 3454 | 0.490 | 0.904 | 0.700 |
| M00279        | MIF-1                              | 3431 | 0.413 | 0.750 | 0.500 |
| M00407        | RSRFC4                             | 3425 | 0.307 | 0.822 | 0.500 |
| M00916        | CREB                               | 3424 | 0.192 | 0.800 | 0.500 |
| LM4_M2        | LM4_M2                             | 3343 | 0.252 | 0.670 | 0.500 |
| M00244        | NGFI-C                             | 3334 | 0.499 | 0.837 | 0.500 |
| M00465        | POU6F1                             | 3299 | 0.178 | 0.870 | 0.500 |
| M00113        | CREB                               | 3296 | 0.359 | 0.808 | 0.500 |
| M00236        | Arnt                               | 3291 | 0.292 | 0.785 | 0.500 |
| M00746        | ELF-1                              | 3207 | 0.279 | 0.890 | 0.500 |
| M00209        | NF-Y                               | 3203 | 0.485 | 0.800 | 0.800 |
| M00513        | ATF3                               | 3106 | 0.083 | 0.806 | 0.500 |
| M00284        | TCF11:MatG                         | 3094 | 0.434 | 0.752 | 0.500 |
| M00134        | HNF-4                              | 3059 | 0.237 | 0.799 | 0.500 |
| M00476        | FOXO4                              | 2994 | 0.497 | 0.822 | 0.633 |
| M00177        | CREB                               | 2979 | 0.242 | 0.814 | 0.500 |
| M01019        | TBX5                               | 2964 | 0.496 | 0.883 | 1.167 |
| M00084        | MZF1                               | 2913 | 0.500 | 0.922 | 0.567 |
| M00001        | MyoD                               | 2802 | 0.491 | 0.869 | 0.800 |
| M00041        | CRE-BP1:c-Jun                      | 2792 | 0.145 | 0.839 | 0.500 |
| M00424        | NKX6-1                             | 2780 | 0.333 | 0.860 | 0.500 |
| M00772        | IRF                                | 2738 | 0.362 | 0.868 | 0.500 |
| M00099        | S8                                 | 2736 | 0.491 | 0.845 | 0.667 |
| M00179        | CRE-BP1                            | 2700 | 0.123 | 0.823 | 0.500 |
| JASPAR_MA0052 | MEF2A                              | 2673 | 0.497 | 0.855 | 1.167 |
| M00220        | SREBP-1                            | 2668 | 0.500 | 0.795 | 0.867 |
| M00122        | USF                                | 2660 | 0.217 | 0.868 | 0.500 |
| M00416        | Cart-1                             | 2644 | 0.478 | 0.806 | 0.500 |
| M00777        | STAT                               | 2635 | 0.216 | 0.877 | 0.500 |
| JASPAR_MA0018 | CREB1                              | 2630 | 0.365 | 0.826 | 0.500 |
| JASPAR_MA0051 | IRF2                               | 2598 | 0.467 | 0.774 | 0.500 |
| M00069        | YY1                                | 2588 | 0.242 | 0.750 | 0.500 |
| M00225        | STAT3                              | 2515 | 0.256 | 0.722 | 0.500 |
| M00433        | Hmx3                               | 2477 | 0.379 | 0.868 | 0.500 |
| M00333        | ZF5                                | 2452 | 0.303 | 0.812 | 0.500 |
| M00185        | NF-Y                               | 2380 | 0.497 | 0.881 | 1.200 |
| M01028        | NRSF                               | 2368 | 0.258 | 0.717 | 0.500 |
| M00172        | AP-1                               | 2342 | 0.491 | 0.951 | 0.900 |
| JASPAR_MA0028 | ELK1                               | 2338 | 0.312 | 0.879 | 0.500 |
| M00292        | Freac-4                            | 2303 | 0.489 | 0.814 | 0.600 |
| M00208        | NF-kappaB                          | 2238 | 0.495 | 0.867 | 0.867 |
| JASPAR_MA0088 | Statf                              | 2234 | 0.167 | 0.813 | 0.500 |
| M00796        | USF                                | 2230 | 0.436 | 0.851 | 0.500 |
| M00007        | Elk-1                              | 2225 | 0.332 | 0.834 | 0.500 |
| M01013        | IPF1                               | 2215 | 0.427 | 0.839 | 0.500 |
| LM9_NRSE      | LM9_NRSE                           | 2159 | 0.380 | 0.657 | 0.500 |
| M00224        | STAT1                              | 2157 | 0.172 | 0.720 | 0.500 |
| M00460        | STAT5A                             | 2153 | 0.256 | 0.727 | 0.500 |
| M00054        | NF-kappaB                          | 2148 | 0.490 | 0.833 | 1.333 |
| JASPAR_MA0038 | Gfi                                | 2143 | 0.153 | 0.916 | 0.500 |
| M00699        | ICSBP                              | 2142 | 0.499 | 0.847 | 0.833 |
| M00250        | Gfi-1                              | 2124 | 0.332 | 0.784 | 0.500 |
| M00764        | HNF-4                              | 2110 | 0.493 | 0.894 | 0.933 |
| M00261        | Olf-1                              | 2053 | 0.375 | 0.802 | 0.500 |
| M00638        | HNF-4alpha                         | 2053 | 0.496 | 0.860 | 0.700 |
| M00965        | LXR,                               | 2039 | 0.495 | 0.790 | 0.533 |
| M00706        | TFII-I                             | 2033 | 0.488 | 0.994 | 1.233 |
| M00290        | Freac-2                            | 2028 | 0.477 | 0.811 | 0.800 |
| M00245        | Egr-3                              | 1958 | 0.499 | 0.846 | 0.600 |
| M00790        | HNF-1                              | 1925 | 0.361 | 0.797 | 0.500 |
| M00256        | NRSF                               | 1910 | 0.287 | 0.655 | 0.500 |
| M00955        | GR                                 | 1889 | 0.425 | 0.728 | 0.500 |
| M00068        | HEN1                               | 1879 | 0.456 | 0.787 | 0.500 |
| M01037        | GLI                                | 1798 | 0.493 | 0.816 | 1.067 |
| JASPAR_MA0070 | Pbx                                | 1790 | 0.494 | 0.823 | 1.167 |
| M00953        | AR                                 | 1789 | 0.345 | 0.707 | 0.500 |
| M01066        | BLIMP1                             | 1788 | 0.493 | 0.847 | 0.567 |
| M00464        | POU3F2                             | 1784 | 0.494 | 0.850 | 1.367 |
| M00325        | neural-restr.-<br>silencer-element | 1779 | 0.302 | 0.688 | 0.500 |
| JASPAR_MA0105 | NFKB1                              | 1765 | 0.479 | 0.798 | 1.000 |
| M00740        | Rb:E2F-1:DP-1                      | 1759 | 0.314 | 0.844 | 0.500 |
| M00419        | MEIS1                              | 1722 | 0.496 | 0.844 | 1.133 |
| M00156        | RORalpha1                          | 1699 | 0.491 | 0.937 | 1.067 |
| M00956        | AR                                 | 1696 | 0.439 | 0.710 | 0.500 |
| M00302        | NF-AT                              | 1692 | 0.307 | 0.916 | 0.500 |
| M00450        | Zic3                               | 1692 | 0.480 | 0.862 | 1.367 |
| M00941        | MEF-2                              | 1679 | 0.211 | 0.895 | 0.500 |
| M00725        | HP1                                | 1648 | 0.424 | 0.874 | 0.500 |
| M00448        | Zic1                               | 1641 | 0.491 | 0.973 | 0.900 |
| M00984        | PEBP                               | 1620 | 0.498 | 0.809 | 0.967 |
| JASPAR_MA0101 | REL                                | 1619 | 0.499 | 0.842 | 1.400 |
| JASPAR_MA0079 | SP1                                | 1607 | 0.494 | 0.952 | 0.767 |
| M00687        | alpha-CP1                          | 1600 | 0.500 | 0.853 | 1.033 |

|               |                |      |       |       |       |
|---------------|----------------|------|-------|-------|-------|
| M00922        | SRF            | 1561 | 0.495 | 0.801 | 0.800 |
| M00053        | c-Rel          | 1527 | 0.492 | 0.951 | 1.267 |
| M00742        | HFH-4          | 1501 | 0.485 | 0.836 | 0.967 |
| M00808        | Pax            | 1493 | 0.496 | 0.944 | 0.500 |
| M00132        | HNF-1          | 1472 | 0.496 | 0.822 | 0.700 |
| M00087        | Ik-2           | 1429 | 0.470 | 0.974 | 0.500 |
| JASPAR_MA0007 | Ar             | 1333 | 0.495 | 0.827 | 0.533 |
| M01036        | COUPTF         | 1274 | 0.265 | 0.786 | 0.500 |
| M00058        | HEN1           | 1258 | 0.491 | 0.785 | 0.500 |
| M00124        | Pbx1b          | 1250 | 0.477 | 0.786 | 1.100 |
| JASPAR_MA0024 | E2F1           | 1235 | 0.483 | 0.842 | 0.500 |
| M00248        | 1-Oct          | 1232 | 0.490 | 0.847 | 1.367 |
| M01067        | GF11           | 1231 | 0.310 | 0.860 | 0.500 |
| M00436        | IPF1           | 1203 | 0.499 | 0.873 | 1.000 |
| M00976        | AHRHIF         | 1182 | 0.496 | 0.973 | 0.500 |
| M00998        | PBX            | 1172 | 0.491 | 0.876 | 1.033 |
| M00737        | E2F-1:DP-2     | 1167 | 0.494 | 0.869 | 0.567 |
| M00694        | E4F1           | 1155 | 0.495 | 0.822 | 0.533 |
| M00251        | XBP-1          | 1135 | 0.446 | 0.768 | 0.500 |
| M00514        | ATF4           | 1131 | 0.308 | 0.870 | 0.500 |
| M00034        | p53            | 1097 | 0.463 | 0.651 | 0.500 |
| M00453        | IRF-7          | 1062 | 0.243 | 0.808 | 0.500 |
| M00738        | E2F-4:DP-1     | 1027 | 0.495 | 0.830 | 0.767 |
| M00233        | MEF-2          | 1013 | 0.494 | 0.804 | 0.533 |
| M00097        | Pax-6          | 1008 | 0.345 | 0.763 | 0.500 |
| M00051        | NF-kappaB      | 1000 | 0.500 | 0.788 | 1.200 |
| M00920        | E2F            | 977  | 0.497 | 0.832 | 0.500 |
| M00516        | E2F            | 945  | 0.408 | 0.827 | 0.500 |
| M00939        | E2F-1          | 888  | 0.419 | 0.853 | 0.500 |
| M00403        | aMEF-2         | 868  | 0.309 | 0.841 | 0.500 |
| M00033        | p300           | 858  | 0.492 | 0.927 | 0.500 |
| M00918        | E2F            | 841  | 0.407 | 0.861 | 0.500 |
| M00186        | SRF            | 826  | 0.494 | 0.886 | 1.033 |
| M00626        | RFX1           | 796  | 0.291 | 0.867 | 0.500 |
| M00648        | MAF            | 793  | 0.494 | 0.812 | 0.700 |
| M00919        | E2F            | 786  | 0.458 | 0.845 | 0.500 |
| M00915        | AP-2           | 756  | 0.484 | 0.970 | 0.500 |
| M00736        | E2F-1:DP-1     | 740  | 0.351 | 0.894 | 0.500 |
| M00972        | IRF            | 738  | 0.268 | 0.907 | 0.500 |
| M00206        | HNF-1          | 722  | 0.493 | 0.910 | 0.567 |
| M00138        | 1-Oct          | 711  | 0.138 | 0.828 | 0.500 |
| M00422        | FOXJ2          | 702  | 0.245 | 0.903 | 0.500 |
| M00332        | Whn            | 693  | 0.491 | 0.931 | 0.500 |
| M00974        | SMAD           | 685  | 0.491 | 0.966 | 1.167 |
| JASPAR_MA0113 | NR3C1          | 675  | 0.249 | 0.849 | 0.500 |
| M00413        | AREB6          | 674  | 0.496 | 0.943 | 1.233 |
| M01045        | AP-2alphaA     | 673  | 0.487 | 0.814 | 1.033 |
| M00145        | Brn-2          | 670  | 0.463 | 0.920 | 0.500 |
| JASPAR_MA0106 | TP53           | 660  | 0.442 | 0.686 | 0.567 |
| M00024        | E2F            | 630  | 0.422 | 0.766 | 0.500 |
| M00474        | FOXO1          | 625  | 0.499 | 0.893 | 1.233 |
| JASPAR_MA0061 | NF-kappaB      | 598  | 0.495 | 0.834 | 1.867 |
| M00954        | PR             | 563  | 0.497 | 0.708 | 0.633 |
| M01011        | HNF1           | 559  | 0.494 | 0.791 | 0.800 |
| M00447        | AR             | 548  | 0.496 | 0.915 | 0.800 |
| M00739        | E2F-4:DP-2     | 539  | 0.494 | 0.973 | 1.033 |
| JASPAR_MA0083 | SRF            | 528  | 0.496 | 0.829 | 1.167 |
| M00940        | E2F-1          | 528  | 0.455 | 0.865 | 0.500 |
| M01017        | PBX1           | 527  | 0.482 | 0.891 | 1.367 |
| M00947        | CP2/LBP-1c/LSF | 523  | 0.455 | 0.931 | 0.500 |
| M00106        | CDP            | 520  | 0.496 | 0.888 | 0.733 |
| M00056        | myogenin       | 508  | 0.402 | 0.756 | 0.500 |
| M01007        | SRF            | 495  | 0.469 | 0.765 | 1.033 |
| M01012        | HNF3           | 490  | 0.384 | 0.871 | 0.500 |
| M00291        | Freac-3        | 483  | 0.497 | 0.890 | 1.267 |
| M00289        | HFH-3          | 481  | 0.486 | 0.891 | 0.933 |
| M00430        | E2F-1          | 473  | 0.499 | 0.985 | 1.400 |
| M00485        | Nkx2-2         | 469  | 0.499 | 0.982 | 1.600 |
| M00634        | GCM            | 446  | 0.484 | 0.906 | 1.067 |
| M00128        | GATA-1         | 445  | 0.494 | 0.891 | 0.867 |
| M00405        | MEF-2          | 444  | 0.239 | 0.870 | 0.500 |
| M00425        | E2F            | 439  | 0.497 | 0.832 | 1.167 |
| M00104        | CDP            | 427  | 0.482 | 0.911 | 1.000 |
| M00426        | E2F            | 410  | 0.395 | 0.899 | 0.500 |
|               | PPARalpha:RXR- |      |       |       |       |
| M00518        | alpha          | 410  | 0.498 | 0.860 | 0.800 |
| M00050        | E2F            | 405  | 0.499 | 0.952 | 0.833 |
| M00729        | Cdx-2          | 394  | 0.487 | 0.893 | 0.733 |
| M00484        | Ncx            | 385  | 0.483 | 0.875 | 0.867 |
| JASPAR_MA0068 | Pax4           | 384  | 0.292 | 0.747 | 0.500 |
| M00622        | C/EBPgamma     | 381  | 0.189 | 0.920 | 0.500 |
| JASPAR_MA0077 | SOX9           | 364  | 0.456 | 0.875 | 2.133 |
| M00192        | GR             | 363  | 0.479 | 0.882 | 0.900 |
| M00427        | E2F            | 361  | 0.283 | 0.903 | 0.500 |

|               |                |     |       |       |       |
|---------------|----------------|-----|-------|-------|-------|
| M00979        | PAX6           | 350 | 0.497 | 0.901 | 0.567 |
| M00045        | E4BP4          | 341 | 0.499 | 0.936 | 1.433 |
| M00063        | IRF-2          | 340 | 0.482 | 0.782 | 1.267 |
| JASPAR_MA0066 | PPARG          | 338 | 0.491 | 0.830 | 0.533 |
|               | PPARalpha:RXR- |     |       |       |       |
| M00242        | alpha          | 323 | 0.495 | 0.823 | 0.767 |
| M00205        | GR             | 312 | 0.494 | 0.908 | 0.900 |
| M00215        | SRF            | 300 | 0.493 | 0.789 | 1.267 |
| M00957        | PR             | 286 | 0.483 | 0.696 | 0.800 |
| M00477        | FOXO3          | 276 | 0.486 | 0.838 | 1.500 |
| M00766        | LXR            | 267 | 0.427 | 0.725 | 1.133 |
| M00079        | Evi-1          | 265 | 0.483 | 0.970 | 1.567 |
| M01044        | TBX5           | 264 | 0.492 | 0.804 | 1.900 |
| M00131        | HNF-3beta      | 256 | 0.492 | 0.896 | 1.200 |
| M00733        | SMAD-4         | 255 | 0.486 | 0.834 | 1.200 |
| M00380        | Pax-4          | 236 | 0.305 | 0.752 | 0.500 |
| M00647        | LXR            | 214 | 0.495 | 0.823 | 0.967 |
| M00004        | c-Myb          | 213 | 0.469 | 0.851 | 0.900 |
| M00257        | RREB-1         | 213 | 0.272 | 0.961 | 0.500 |
| M00088        | Ik-3           | 213 | 0.498 | 0.959 | 0.767 |
| M00809        | FOX            | 211 | 0.493 | 0.907 | 1.000 |
| M00062        | IRF-1          | 209 | 0.498 | 0.930 | 1.033 |
| M01020        | TBX5           | 204 | 0.490 | 0.922 | 1.100 |
| M00480        | LUN-1          | 196 | 0.500 | 0.821 | 0.633 |
| M00059        | YY1            | 185 | 0.497 | 0.867 | 0.967 |
| M00472        | FOXO4          | 184 | 0.489 | 0.918 | 1.100 |
| M00346        | GATA-1         | 182 | 0.495 | 0.894 | 2.100 |
| M00538        | HTF            | 182 | 0.484 | 0.836 | 0.733 |
| JASPAR_MA0040 | Foxq1          | 180 | 0.500 | 0.987 | 1.800 |
| M00463        | POU3F2         | 180 | 0.500 | 0.958 | 1.000 |
| M00810        | SRF            | 177 | 0.475 | 0.893 | 1.033 |
| M00466        | HIF-1          | 173 | 0.497 | 0.914 | 1.033 |
| M00150        | Brachyury      | 154 | 0.494 | 0.775 | 0.667 |
| M00665        | Sp3            | 151 | 0.384 | 0.965 | 0.500 |
| M00410        | SOX-9          | 148 | 0.473 | 0.954 | 1.600 |
| M00794        | TTF-1          | 147 | 0.490 | 0.887 | 1.300 |
| M00717        | Pax-8          | 146 | 0.479 | 0.885 | 0.900 |
| M00075        | GATA-1         | 129 | 0.434 | 0.906 | 0.500 |
| M00130        | FOXD3          | 126 | 0.492 | 0.926 | 0.600 |
| JASPAR_MA0112 | ESR1           | 120 | 0.483 | 0.831 | 1.167 |
| M00987        | FOXP1          | 119 | 0.471 | 0.902 | 0.500 |
| M00137        | 1-Oct          | 118 | 0.458 | 0.884 | 0.700 |
| M00797        | HIF-1          | 117 | 0.462 | 0.858 | 1.267 |
| JASPAR_MA0009 | T              | 106 | 0.491 | 0.873 | 1.700 |
| M00183        | c-Myb          | 101 | 0.495 | 0.903 | 2.200 |
| JASPAR_MA0073 | RREB1          | 92  | 0.500 | 0.920 | 0.500 |
| M00203        | GATA-X         | 87  | 0.460 | 0.913 | 1.500 |
| M00444        | VDR            | 87  | 0.483 | 0.865 | 1.233 |
| JASPAR_MA0042 | FOXl1          | 85  | 0.447 | 0.993 | 1.033 |
| M00456        | FAC1           | 81  | 0.469 | 0.955 | 0.567 |
| M00807        | EGR            | 79  | 0.481 | 0.966 | 1.733 |
| M00721        | CACCC-binding  | 77  | 0.494 | 0.940 | 0.933 |
| M00646        | LF-A1          | 76  | 0.447 | 0.910 | 2.567 |
| M00129        | HFH-1          | 76  | 0.500 | 0.990 | 1.867 |
| M00057        | COMP1          | 70  | 0.486 | 0.839 | 0.633 |
| M00235        | AhR:Arnt       | 69  | 0.493 | 0.885 | 1.067 |
| M00294        | HFH-8          | 69  | 0.493 | 0.960 | 2.067 |
| M00214        | SEF-1          | 67  | 0.478 | 0.813 | 0.733 |
| M00631        | FXR/RXR-alpha  | 66  | 0.485 | 0.935 | 1.200 |
| TBX_V2        | TBX            | 60  | 0.433 | 0.702 | 1.000 |
| M00191        | ER             | 56  | 0.500 | 0.922 | 0.633 |
| M01072        | HIC1           | 55  | 0.473 | 0.957 | 0.500 |
| M00515        | PPARG          | 50  | 0.400 | 0.799 | 0.900 |
